# Supplementary material
Source: PubMed Central journal article supplement (PMC3817554)
Supplement: cr201399x1.pdf [file cr201399x1.pdf]

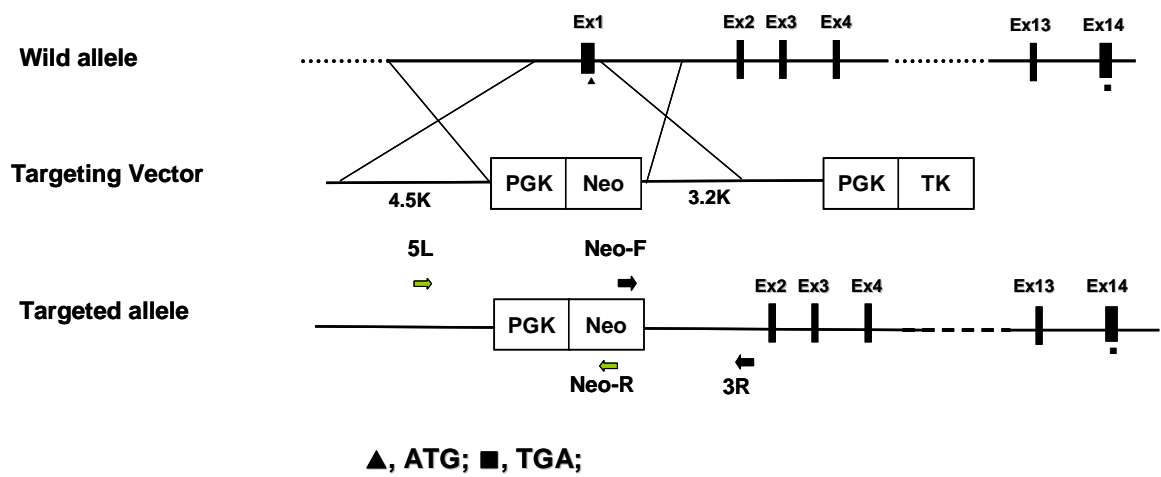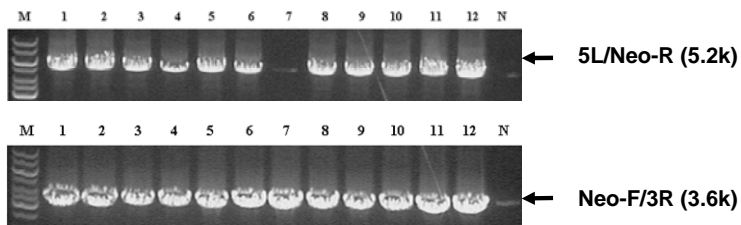

**Supplementary Figure 1. Construction and identification of IRTKS-KO mice.**

Schematic diagram of constructing IRTKS-KO mice via targeting the first exon of IRTKS. Lower panel shows the genetic identification of ES clones..
