# Supplementary material
Source: PubMed Central journal article supplement (PMC3817554)
Supplement: cr201399x2.pdf [file cr201399x2.pdf]

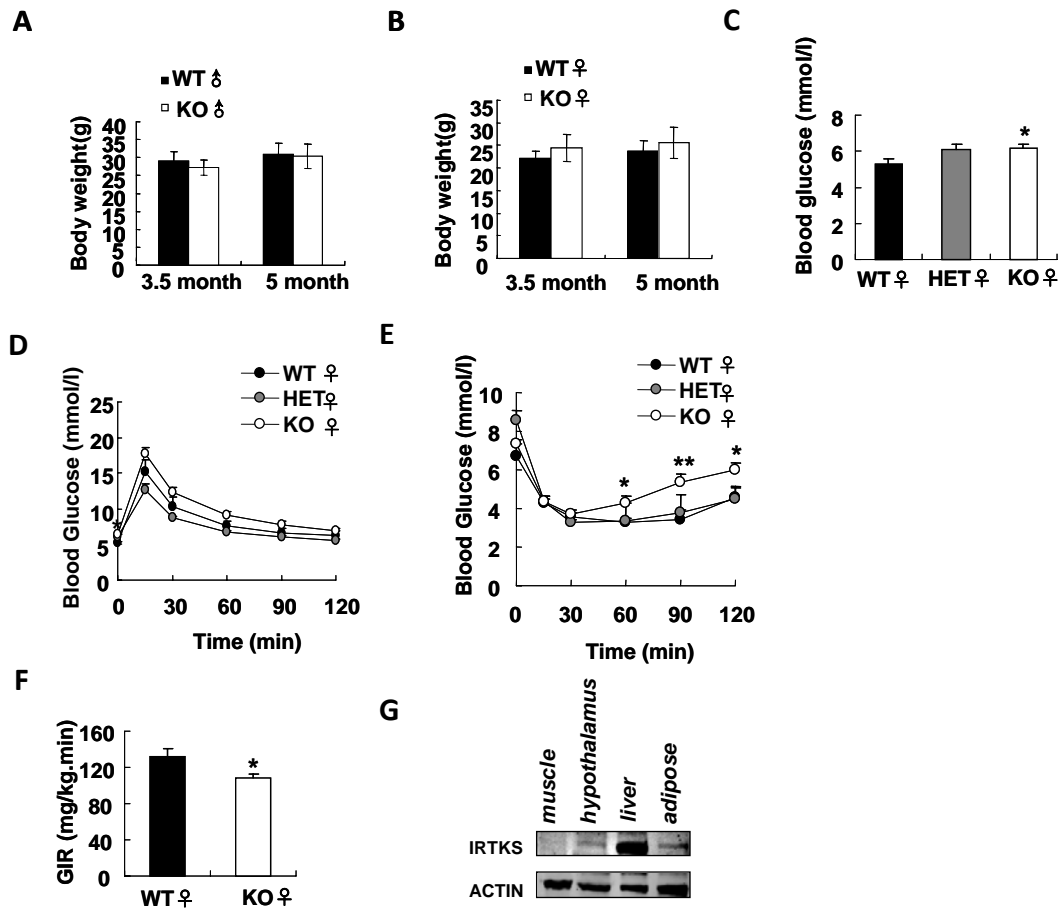

**Supplementary Figure 2. Female IRTKS knockout (KO) mice exhibit mild insulin resistance.** (A-B) The body weight of male and female IRTKS-KO mice and wild type littermates. (C) Blood glucose levels in 4-month-old female IRTKS KO, HET mice and wild type (WT) littermates fed by regular diets after a 6 h fast (n = 6-8). (D and E) Glucose tolerance tests (GTTs) (fasted 6h, then ip glucose 1.5g/kg) (D) and insulin tolerance tests (ITTs) (1 U/kg) (E) in female IRTKS KO, HET mice and WT littermates (n = 6-8). (F) Glucose infusion rate (GIR) in female IRTKS KO mice and WT littermates (n = 5). Insulin was infused at 5 mU/kg.min. (G) IRTKS protein expression in metabolism-related organs and tissues of WT mice.
