# Supplementary material
Source: PubMed Central journal article supplement (PMC3817554)
Supplement: cr201399x3.pdf [file cr201399x3.pdf]

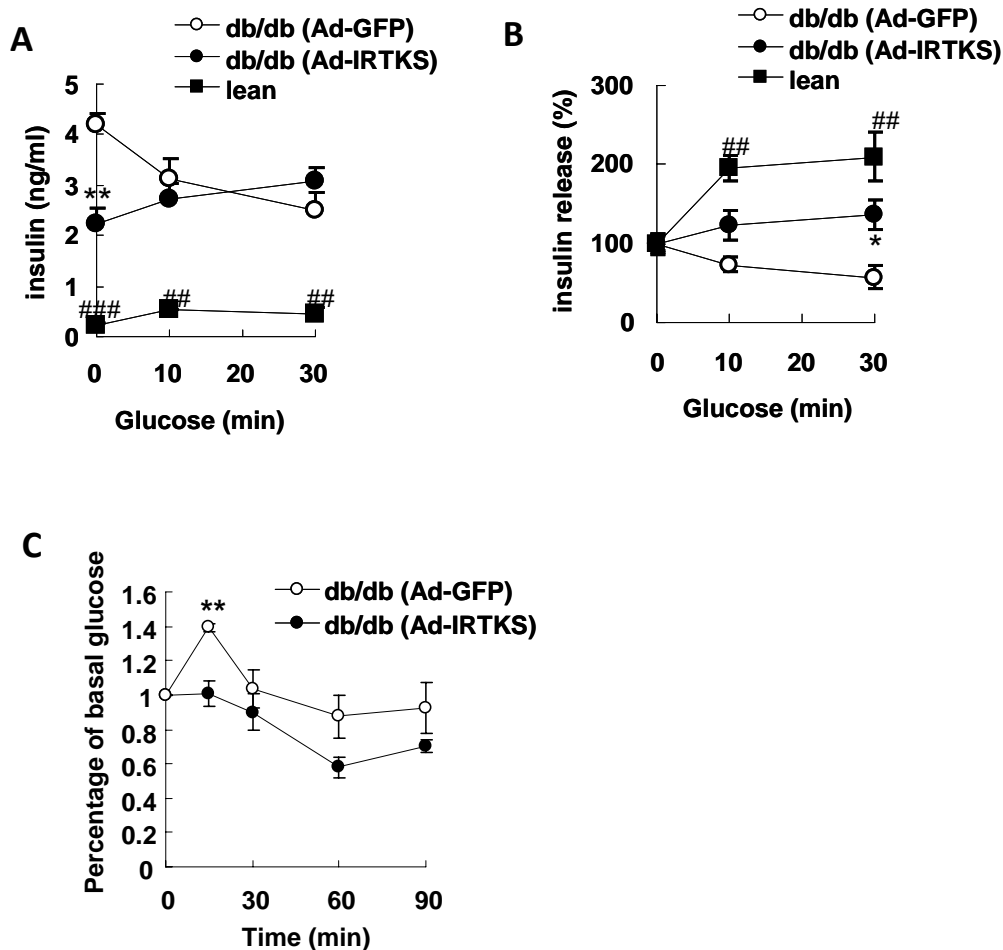

**Supplementary Figure 3.** (A and B) Glucose (ip 1.5 g/kg) stimulated changes in serum insulin levels (A) and their relative fold changes as percentage of the base insulin levels (B) in *db/db* mice injected with Ad-GFP or Ad-IRTKS ( $n = 4$ ). Lean mice as control ( $n = 5$ ). (C) Insulin tolerance tests (ITTs) (1U/kg) in *db/db* mice injected with Ad-GFP or Ad-IRTKS ( $n = 4$ ). Data are presented as the mean  $\pm$  s.e.m. \* $P < 0.05$ , \*\* $P < 0.01$  versus Ad-IRTKS. #  $P < 0.05$ , ##  $P < 0.01$  versus lean mice.
