# Supplementary material
Source: PubMed Central journal article supplement (PMC3817554)
Supplement: cr201399x5.pdf [file cr201399x5.pdf]

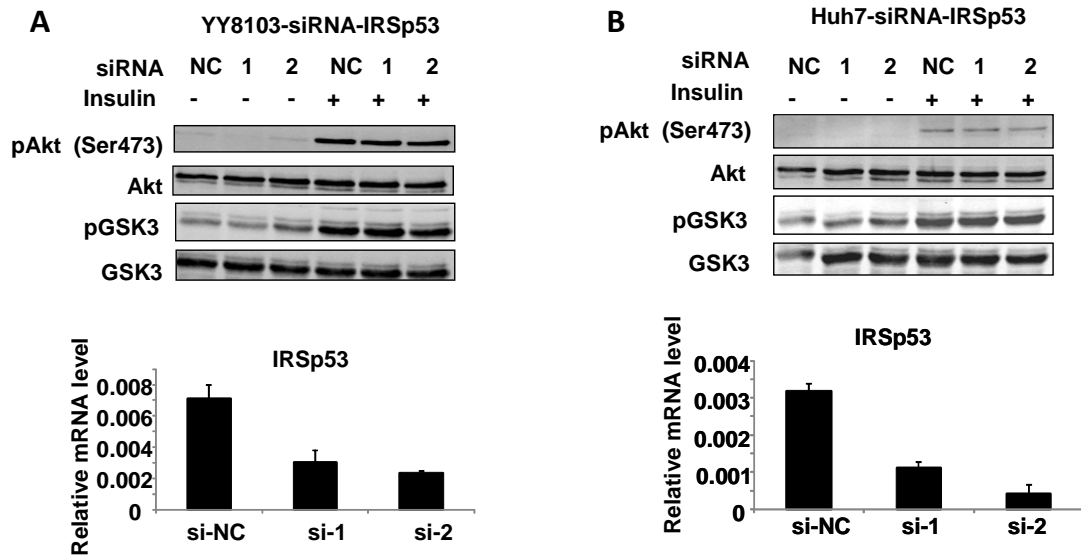

**Supplementary Figure 5. Insulin signalling in HCC cell lines as IRSp53 knockdown.** (A and B) Phosphorylation levels of AKT at serine 473 and GSK3 $\beta$  at serine 9 in YY8103 (A) or Huh-7 cells (B) upon IRSp53 knockdown. Real-Time PCR indicated that IRSp53 expression was decreased upon knockdown (bottom).
