# Supplementary material
Source: PubMed Central journal article supplement (PMC3817554)
Supplement: cr201399x6.pdf [file cr201399x6.pdf]

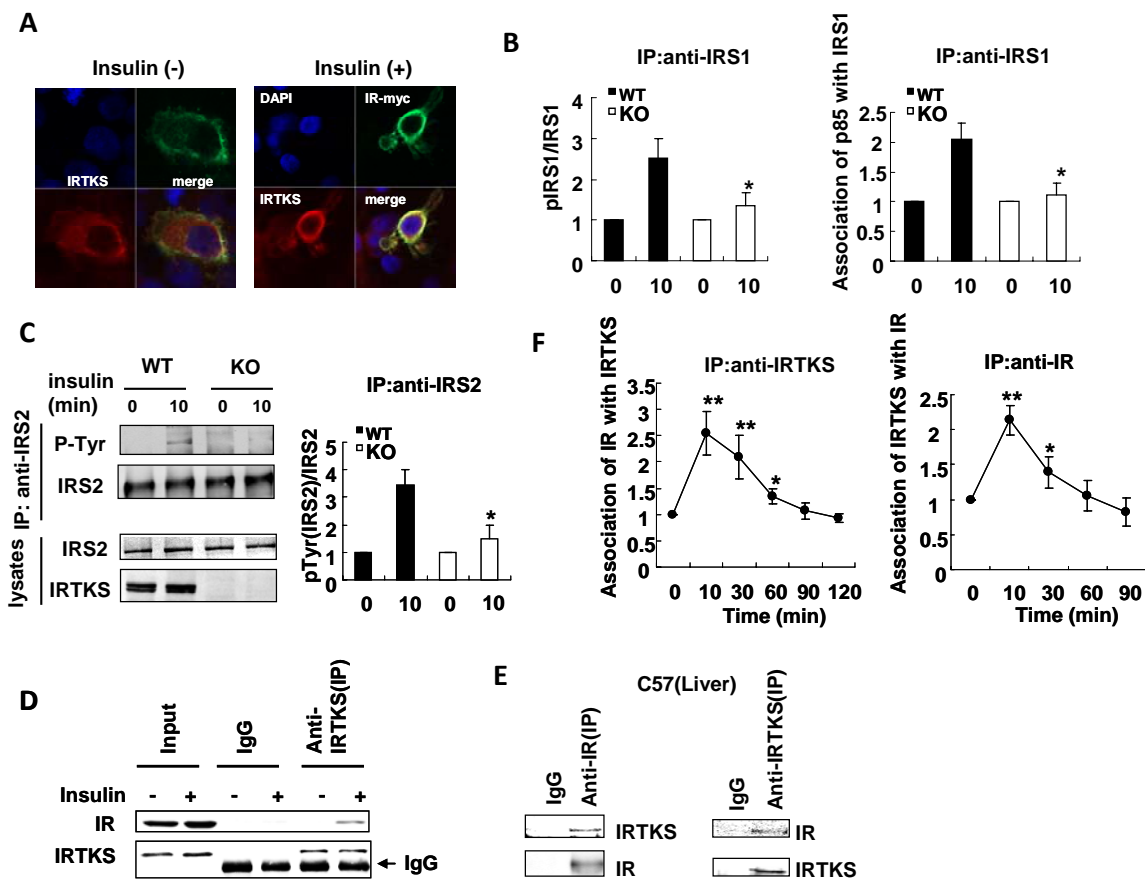

**Supplementary Figure 6.** (A) Co-localisation of IR and IRTKS in Huh-7 cells with or without insulin stimulation. (B) Densitometric analysis of Figure 5D. (C) Co-immunoprecipitation (Co-IP) experiments in liver extracts of IRTKS-KO mice and wild type (WT) littermates with anti-IRS2 antibody. (D) Co-IP experiment in Huh-7 cells with anti-IRTKS antibody. (E) Co-IP experiments in C57BL/6 liver extracts with anti-IR or anti-IRTKS antibodies. (F) Densitometric analysis of Figure 5H. Data are presented as the mean  $\pm$  s.d. \*P < 0.05, \*\*P < 0.01 versus control.
