# Supplementary material
Source: PubMed Central journal article supplement (PMC3817554)
Supplement: cr201399x7.pdf [file cr201399x7.pdf]

**A**

|                            | Lean              | db/db             | p value             |
|----------------------------|-------------------|-------------------|---------------------|
| <b>BW (g)</b>              | <b>22.18±0.51</b> | <b>39.1±1.64</b>  | <b>p&lt; 0.0001</b> |
| <b>BG(mmol/l)- 6h fast</b> | <b>5.21±0.15</b>  | <b>17.44±1.52</b> | <b>p&lt; 0.0001</b> |
|                            |                   |                   |                     |
|                            | RD                | HFD (12wks)       | p value             |
| <b>BW (g)</b>              | <b>30.24±0.59</b> | <b>47.64±1.33</b> | <b>p&lt; 0.0001</b> |
| <b>Random BG (mmol/l)</b>  | <b>7.64±0.28</b>  | <b>17.74±0.85</b> | <b>p&lt; 0.0001</b> |

**B**

|                            |               | diabetes          | normal            | p value       |
|----------------------------|---------------|-------------------|-------------------|---------------|
| <b>sex</b>                 | <b>male</b>   | <b>9</b>          | <b>9</b>          | <b>1</b>      |
|                            | <b>female</b> | <b>4</b>          | <b>4</b>          |               |
| <b>BG(mmol/l)- 6h fast</b> |               | <b>8.6±1.1</b>    | <b>5.2±0.3</b>    | <b>0.0025</b> |
| <b>age</b>                 |               | <b>59.54±1.84</b> | <b>60.77±1.94</b> | <b>0.64</b>   |

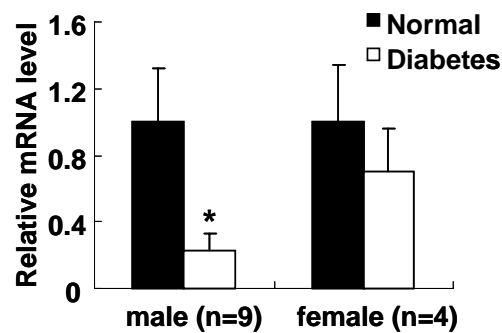

**Supplementary Figure 7. (A)** The Body weight (BW) and blood glucose (BG) levels of *db/db* mice and high-fat diet (HFD)-induced obese mice used in Figure 6. **(B)** Clinical features from patients with type 2 diabetes and healthy volunteers. The relative mRNA levels of IRTKS in livers were examined. Data are presented as the mean ± s.e.m. \*P < 0.05 versus control.
